# Supplementary material for: MiR-34a Promotes Osteogenic Differentiation of Human Adipose-Derived Stem Cells via the RBP2/NOTCH1/CYCLIN D1 Coregulatory Network
Source: PubMed Central journal article supplement — Stem Cell Reports. 2016 Jul 21;7(2):236–48. doi: 10.1016/j.stemcr.2016.06.010 (PMC4982986; doi:10.1016/j.stemcr.2016.06.010), 2016-07-21
Supplement: mmc1.pdf [file mmc1.pdf]

**Stem Cell Reports, Volume 7**

**Supplemental Information**

**MiR-34a Promotes Osteogenic Differentiation of Human Adipose-Derived Stem Cells via the *RBP2/NOTCH1/CYCLIN D1* Coregulatory Network**

**Cong Fan, Lingfei Jia, Yunfei Zheng, Chanyuan Jin, Yunsong Liu, Hao Liu, and Yongsheng Zhou**

## Supplemental Figures and Legends

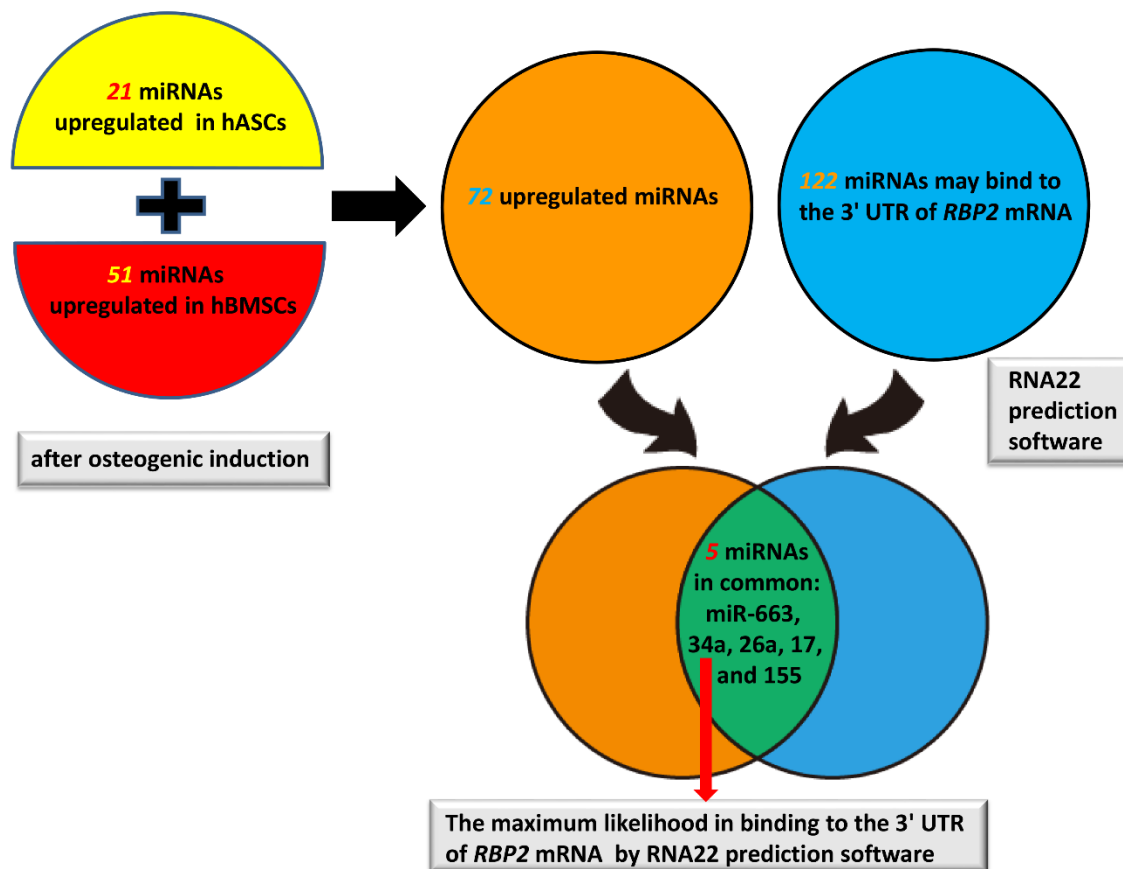

**Figure S1 (related to introduction).** The procedure for screening and selecting miR-34a for research. 21 and 51 miRNAs were upregulated in hASCs (miRNA expression profile during osteogenic differentiation of hASCs done by Zhang et al, J Cell Biochem, 2012, 113: 888–898) and bone marrow derived MSCs (miRNA expression profile during osteogenic differentiation of hBMSCs done by Gao et al, J Cell Biochem, 2011, 112: 1844–1856), respectively. RNA22 prediction software indicated 122 miRNAs might bind to the 3' UTR of *RBP2* mRNA. By combining and comparing the miRNAs from these two screening methods, an intersection of five

miRNAs were obtained: miR-663, 34a, 26a, 17, and 155. The RNA22 prediction software indicated that miR-34a possessed the maximum likelihood for binding to the 3' UTR of *RBP2* mRNA; therefore, we selected miR-34a for research.

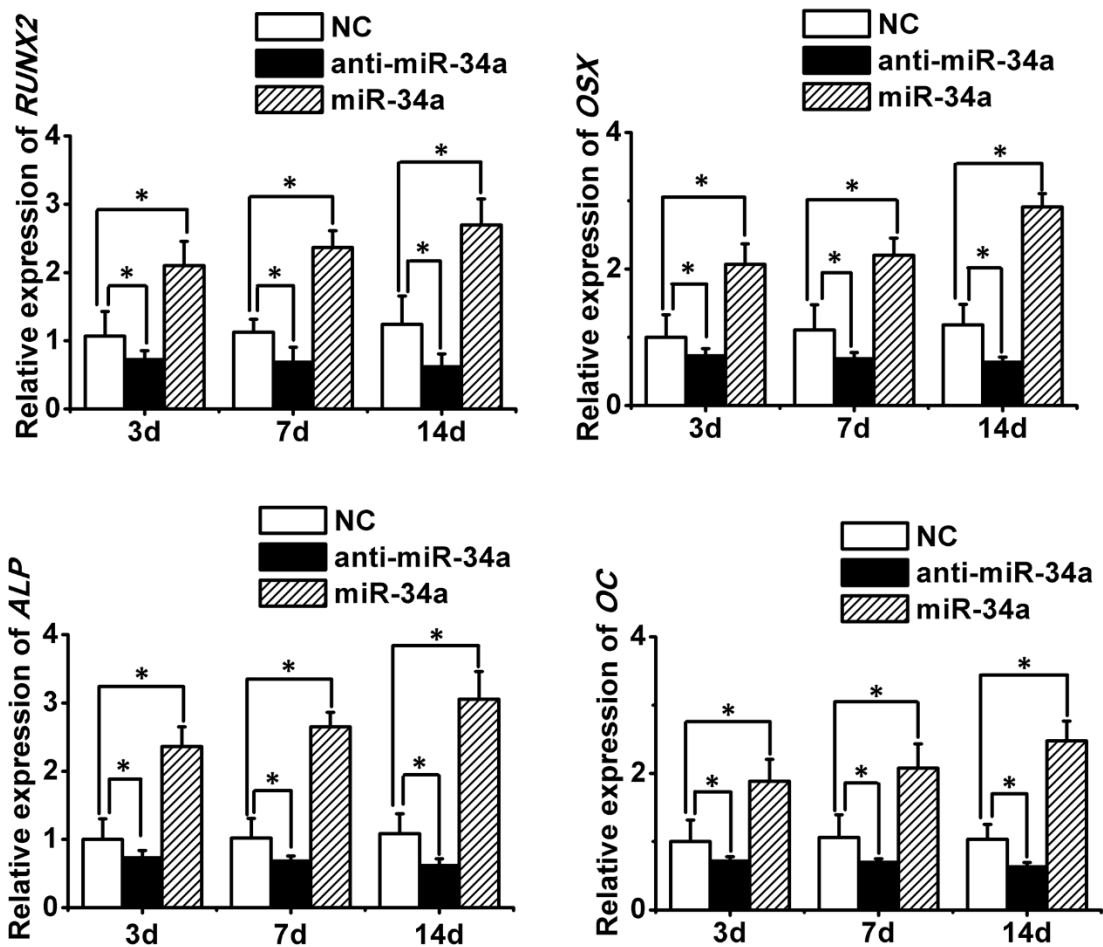

**Figure S2 (related to main figure 2F).** The effect of miR-34a on *RUNX2*, *OSX*, *ALP* and *OC* mRNA expression in hASCs cultured in PM.

(*RUNX2*, runt-related transcription factor 2; *OSX*, osterix; *ALP*, alkaline phosphatase; *OC*, osteocalcin; *PM*, proliferation medium).

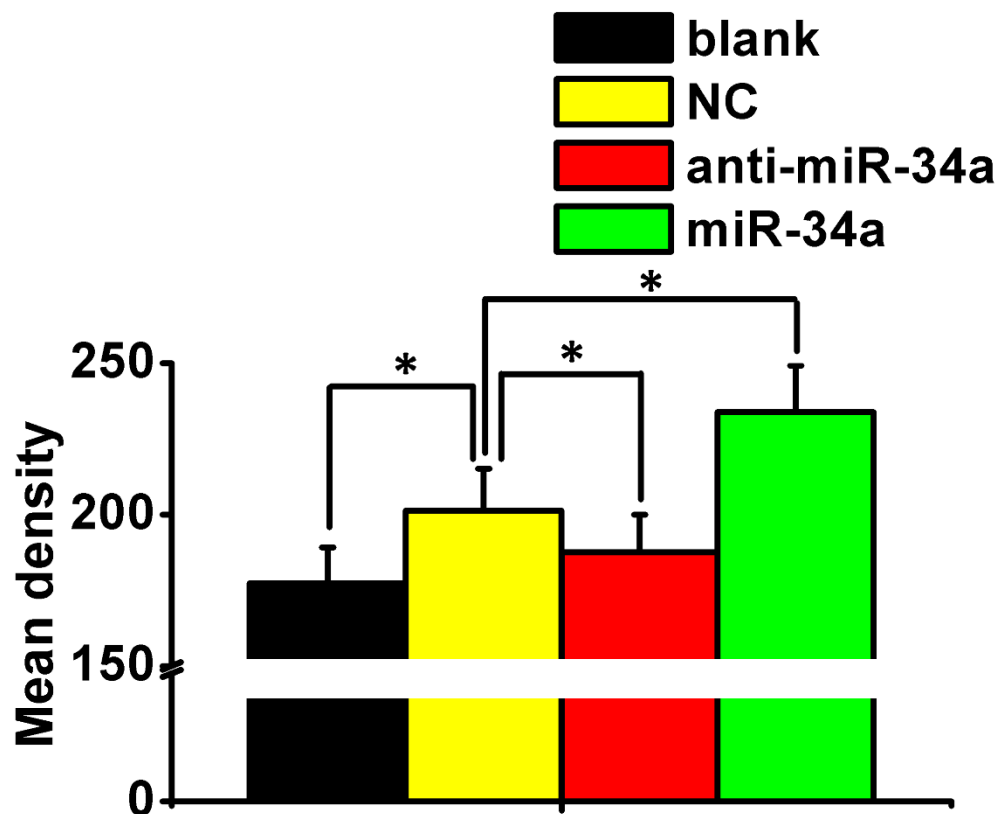

**Figure S3 (related to main figure 3D-b).** Quantification of HE staining. Data was represented as the mean  $\pm$  SD of three independent areas in each group.

(*HE, hematoxylin and eosin; Blank, scaffolds without hASCs; NC/anti-miR-34a/miR-34a, scaffolds seeded with hASCs transfected by lentivirus negative control/antisense miR-34a/miR-34a mimics*).

# NOTCH1

| miRNA identifier | leftmost position of predicted target site | cDNA region | folding energy (in -Kcal/mol) includes contribution from linker | base pairs in putative heteroduplex | span of target | p-value  |
|------------------|--------------------------------------------|-------------|-----------------------------------------------------------------|-------------------------------------|----------------|----------|
| hsa_miR_34a      | 8237                                       | 3'UTR       | -17.70                                                          | 14                                  | 20             | 0.003420 |
| hsa_miR_34a      | 8353                                       | 3'UTR       | -17.50                                                          | 15                                  | 21             | 0.265000 |
| hsa_miR_34a      | 8638                                       | 3'UTR       | -19.90                                                          | 13                                  | 23             | 0.047700 |
| hsa_miR_34a      | 9059                                       | 3'UTR       | -16.50                                                          | 16                                  | 20             | 0.329000 |

# CYCLIN D1

| miRNA identifier | leftmost position of predicted target site | cDNA region | folding energy (in -Kcal/mol) includes contribution from linker | base pairs in putative heteroduplex | span of target | p-value  |
|------------------|--------------------------------------------|-------------|-----------------------------------------------------------------|-------------------------------------|----------------|----------|
| hsa_miR_34a      | 1910                                       | 3'UTR       | -12.10                                                          | 14                                  | 21             | 0.380000 |
| hsa_miR_34a      | 2059                                       | 3'UTR       | -12.10                                                          | 17                                  | 24             | 0.051800 |
| hsa_miR_34a      | 3179                                       | 3'UTR       | -14.20                                                          | 16                                  | 19             | 0.081000 |
| hsa_miR_34a      | 3808                                       | 3'UTR       | -19.20                                                          | 15                                  | 20             | 0.026100 |
| hsa_miR_34a      | 3886                                       | 3'UTR       | -18.60                                                          | 14                                  | 22             | 0.186000 |

**Figure S4 (related to main figure 5A, 5B).** The potential miR-34a target sites in *NOTCH1* and *CYCLIN D1* transcripts were predicted by RNA22 software.

**A**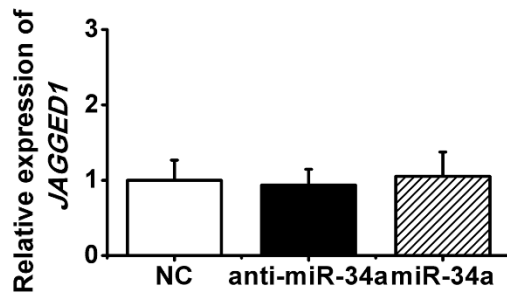**B**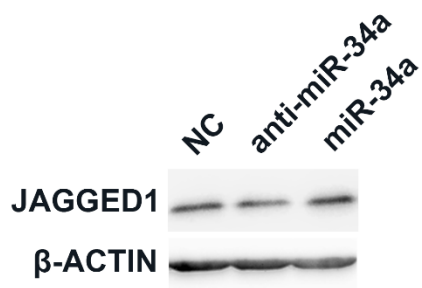**C**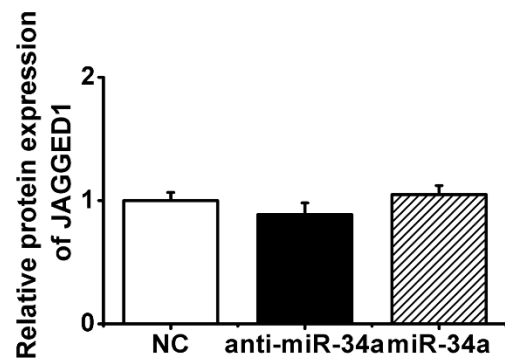

**Figure S5 (related to discussion).** qRT-PCR (A), Western blotting and quantitative analysis (B, C) of *JAGGED1* expression in hASCs with overexpression or knock-down of miR-34a.

## Supplemental Table

**Table S1. Sequences of the primers used for qRT-PCR.**

|                         | <b>Forward primer (5' to 3')</b> | <b>Reverse primer (5' to 3')</b> |
|-------------------------|----------------------------------|----------------------------------|
| <b><i>RBP2</i></b>      | GTCCAGCGCCTGAATGAACTT            | GCAACAATCTTGCTCAAAGCATA          |
| <b><i>NOTCH1</i></b>    | CGCTGACGGAGTACAAGTG              | GTAGGAGCCGACCTCGTTG              |
| <b><i>P27</i></b>       | ATGTCAAACGTGCGAGTGTCTAA          | TTACGTTTGACGTCTTCTGAGG           |
| <b><i>CYCLIN D1</i></b> | GTGCTGCGAAGTGGAACC               | ATCCAGGTGGCGACGATCT              |
| <b><i>RUNX2</i></b>     | CCGCCTCAGTGATTTAGGGC             | GGGTCTGTAATCTGACTCTGTCC          |
| <b><i>OSX</i></b>       | CCTCTGCGGGACTCAACAAC             | TAAAGGGGGCTGGATAAGCAT            |
| <b><i>ALP</i></b>       | ATGGGATGGGTGTCTCCACA             | CCACGAAGGGGAACCTTGTC             |
| <b><i>OC</i></b>        | CACTCCTCGCCCTATTGGC              | CCCTCCTGCTTGGACACAAAG            |
| <b><i>GAPDH</i></b>     | GAAGGTGAAGGTCGGAGTC              | GAAGATGGTGATGGGATTTC             |
| <b><i>U6</i></b>        | CTCGCTTCGGCAGCACA                | AACGCTTCACGAATTTGCGT             |

*Abbreviations: RBP2, retinoblastoma binding protein 2; Runx2, runt-related transcription factor 2; OSX, osterix; ALP, alkaline phosphatase; OC, osteocalcin.*



### **Supplemental References**

Gao, J., Yang, T., Han, J., Yan, K., Qiu, X., Zhou, Y., Fan, Q., and Ma, B. (2011). MicroRNA expression during osteogenic differentiation of human multipotent mesenchymal stromal cells from bone marrow. *J Cell Biochem* 112, 1844–1856.

Zhang, Z.J., Zhang, H., Kang, Y., Sheng, P.Y., Ma, Y.C., Yang, Z.B., Zhang, Z.Q., Fu, M., He, A.S., and Liao, W.M. (2012). MiRNA expression profile during osteogenic differentiation of human adipose-derived stem cells. *J Cell Biochem* 113, 888–898.
